# Supplementary material for: A Single Autoimmune T Cell Receptor Recognizes More Than a Million Different Peptides
Source: PubMed Central journal article supplement — J Biol Chem. 2011 Nov 18;287(2):1168–77. doi: 10.1074/jbc.M111.289488 (PMC3256900; doi:10.1074/jbc.m111.289488), 2011-11-18
Supplement: supp_M111.289488_jbc.M111.289488-1.pdf [file supp_M111.289488_jbc.M111.289488-1.pdf]

Supplemental Data for

**A single autoimmune T-cell receptor  
recognizes over a million different peptides**

Linda Wooldridge<sup>#</sup>, Julia Ekeruche-Makinde<sup>#</sup>, Hugo A. van den Berg<sup>#</sup>, Anna Skowera, John J. Miles, Mai Ping Tan, Garry Dolton, Mathew Clement, Sian Llewellyn-Lacey, David A. Price, Mark Peakman and Andrew K. Sewell

File prepared by LW. E-mail: wooldridgel@cardiff.ac.uk

<sup>#</sup>These authors contributed equally to this study.

Supplemental Equations S1 and S2

Supplemental Figures S1 to S6

Supplemental Tables S1 to S3

Supplemental References

## SUPPLEMENTAL EQUATIONS

### *Estimation of $pEC_{50}$*

Functional sensitivity is expressed by the  $pEC_{50}$  of that peptide with respect to the TCR. This is defined as minus 1 times the base-10 logarithm of the 50% efficacy concentration. Accordingly, The read-out  $y$  (MIP1 $\beta$  by ELISA) is related to the incubation concentration  $C$ , as follows:

$$y = y_{\min} + \frac{y_{\max} - y_{\min}}{1 + 10^{\kappa(pEC_{50} + \log C)}} \quad (S1)$$

where  $y_{\min}$ ,  $y_{\max}$ , and  $\kappa$  are parameters that were estimated using non-linear least squares. Parsimony was achieved through simultaneous fitting; i.e.  $y_{\min}$ ,  $y_{\max}$ , and  $\kappa$  were assumed to have the same value for all peptides ( $\kappa$  is the steepness of the dose-response curve). Eqn (S1) is derived by assuming, first, that each pMHC molecule contributes a signal  $w_{ij}$  where  $i$  denotes the TCR clonotype and  $j$  the pMHC ligand, so that the combined signal generated by  $Z_j$  copies of the ligand present in the contact area between the CD8<sup>+</sup> T-cell and the C1R-A2 B-cell is given by  $Z_j w_{ij}$ ; the quantity  $w_{ij}$  represents the functional sensitivity. Second, it is assumed that the CD8<sup>+</sup> T-cell is activated when the signal  $Z_j w_{ij}$  exceeds a signalling threshold  $W_{act}(1)$ , which is assumed to follow a log-logistic distribution. Third, it is assumed that  $Z_j$  is proportional to the pulsing concentration (the proportionality is unknown but is eliminated by studying the ratio relative to the  $EC_{50}$  of the index peptide; i.e. the difference in  $pEC_{50}$ ). Then, the  $EC_{50}$  is inversely proportional to  $w_{ij}$  and eqn (S1)

follows by assuming that the fraction of responding CD8<sup>+</sup> T-cells is proportional to the response above baseline ( $y_{\min}$ ).

### *Theoretical curve*

For comparison, the curve derived from TCR activation theory (1,2) is also shown (grey dashed line in Figure 4), based on the formula for the number of peptides with a relative functional sensitivity that is at least as strong as  $\omega$ :

$$\mathcal{N}[pEC_{50} - pEC_{50}^{\text{index}} > \omega] = \frac{N_0}{2} \left( \text{erf} \left[ \frac{\beta}{\alpha\sqrt{2}} \left( 1 + \alpha - (\omega - \gamma) \log 10 + \mathcal{W}_0 \left( -e^{-1+(\omega-\gamma) \log 10} \right) \right) \right] - \text{erf} \left[ \frac{\beta}{\alpha\sqrt{2}} \left( 1 + \alpha - (\omega - \gamma) \log 10 + \mathcal{W}_{-1} \left( -e^{-1+(\omega-\gamma) \log 10} \right) \right) \right] \right) \quad (\text{S2})$$

where erf denotes the error function,  $\mathcal{W}$  denotes the Lambert W-function,  $N_0$  is the number of MHC-anchorable peptides,  $\alpha$  is a location parameter,  $\beta$  is a specificity parameter, and  $\gamma$  is an offset to account for the fact that the index peptide, rather than the absolutely optimal peptide, is used as reference.

## SUPPLEMENTAL FIGURE LEGENDS

**Figure S1: Position degeneracy of the 1E6 TCR.** MIP1 $\beta$  activation data for a set of peptides with the sequence ALWGPDPxAA, where x is 1 of the 20 natural proteogenic L-amino acids.  $6 \times 10^4$  C1R-A2 B-cells were pulsed with peptides at various concentrations. After 2 hours,  $3 \times 10^4$  1E6 CD8<sup>+</sup> T-cells were added and incubated overnight. Supernatant was harvested and assayed for MIP1 $\beta$ .

**Figure S2: Recognition of peptides sampled at random from large fixed motif sets. A&B.** The response of 1E6 CD8<sup>+</sup> T-cells to 30 peptides sampled at random from a large motif-restricted set:

RQWGPDP{A/C/D/F/H/I/K/L/M/N/P/R/S/V/Y}{A/C/G/H/I/K/L/M/N/P/Q/R/S/T/V}

A;

total set size = 225). Assays as in Figure S1. **A.** Selected titration curves are shown to demonstrate the range of functional sensitivities observed within the set of 30 peptides. Standard deviation from the mean of two replicates is shown. **B.** The functional sensitivities of all peptides tested are displayed relative to that of the index peptide ( $pEC_{50} - pEC_{50}$  index) to control for variations in absolute values between assays. Peptides with a functional sensitivity equivalent to index have a value 0, peptides with a functional sensitivity greater than index have values  $>0$  and peptides that are less immunogenic than index have values  $<0$ . Coloured bars match the key shown in panel A for individual peptides in the set. **C&D.** Details as for A&B, except that the motif is RQWGP{D/F}{P/F}xx{A/I/L/V} where x denotes any one of the 19 amino acids excluding cysteine and the total set size = 5776.

**Figure S3: Recognition of 30 peptides sampled at random from large peptide sets (motif: RQxGPDxxxA; total set size =  $19^4$  or xQxGPDxxxV; total set size =  $19^5$ ).**

Assays as in Figure S1. The functional sensitivities of all peptides tested are displayed relative to that of the index peptide ( $pEC_{50} - pEC_{50}$  index).

**Figure S4: Recognition of peptides selected by CPL-based importance sampling.**

**A&B.**  $1E6$  CD8<sup>+</sup> T-cell recognition of two sets of 30 peptides sampled from a CPL-based importance sampling set with effective size =  $1.66 \times 10^8$  (calculated from the sampling entropy). Assays as described in Figure S1 legend.

**Figure S5: *Mathematica* code.** Peptides were sampled at random from larger motif-restricted or CPL-based importance sampling sets varying in total size from 225 to  $1.66 \times 10^8$  individual peptides using Mathematica<sup>®</sup> (Wolfram Research Europe Ltd., Long Hanborough, UK). Displayed are the codes to generate the peptide samples as well as an example of the simultaneous non-linear curve fitting procedure. The workspace file is available upon request.

**Figure S6: The functional sensitivity of  $1E6$  CD8<sup>+</sup> T-cells to all peptide ligands tested.**

Simultaneous curve fitting (as described in supplementary equations; eqn S1) was used to estimate functional sensitivity measured as  $pEC_{50}$  for peptides sampled from:

**A:**

RQWGPDP{A/C/D/F/H/I/K/L/M/N/P/R/S/V/Y}{A/C/G/H/I/K/L/M/N/P/Q/R/S/T/V}

A (set size 225; 30 peptides sampled at random); **B:**

RQWGP{D/F}{P/F}xx{A/I/L/V} (set size 5776; 30 peptides sampled at random); **C:**

RQxGPDxxxA (set size  $19^4$ ; 30 peptides sampled at random); **D**: xQxGPDxxxV (set size  $19^5$ ; 30 peptides sampled at random) and **E&F**: two replicates of a biased sampling set (effective set size  $1.66 \times 10^8$ , calculated from the sampling entropy); each set of 30 peptides was sampled with bias towards strong agonists, weighted based on the primary CPL scan. Values for each peptide are displayed in Table S3.

## SUPPLEMENTAL TABLE LEGENDS

**Table S1: Data matrix used for derivation of biased sampling set.** First, raw data values generated from the decamer CPL scan (MIP1 $\beta$  levels in pg/ml) were inserted into the table. The following modifications were then made, based on results obtained with previous peptide screening of the 1E6 clone (data not shown): cysteine set to zero; small or negative values set to 5; position 2: double weight Q; position 3: assign 400 to A, E, K and N, turn V up to 400; position 4: tune L and W down to 50; position 5: tune all responses down to 50 except for P; position 6: tune all responses down to 50 except R & M; position 7: leave as original screen data; position 8: 500 for A, 200 for F, R and V; position 9: 200 for F; position 10: tune V down to 1000, add value for index peptide for A and increase weight of L to 2000.

**Table S2: Normalized matrix used for derivation of biased sampling set.** All MIP1 $\beta$  readings from Table S1 were given a value between 0-1.

**Table S3:  $pEC_{50}$  values for all peptide ligands tested.** Simultaneous curve fitting (as described in supplementary equations) was used to estimate functional sensitivity measured as  $pEC_{50}$  for every peptide tested (see Figure S6).

## SUPPLEMENTAL REFERENCES

1. van den Berg, H. A., Rand, D. A., and Burroughs, N. J. (2001) *J Theor Biol* **209**, 465-486
2. van den Berg, H. A., and Rand, D. A. (2007) *Immunol Rev* **216**, 81-92





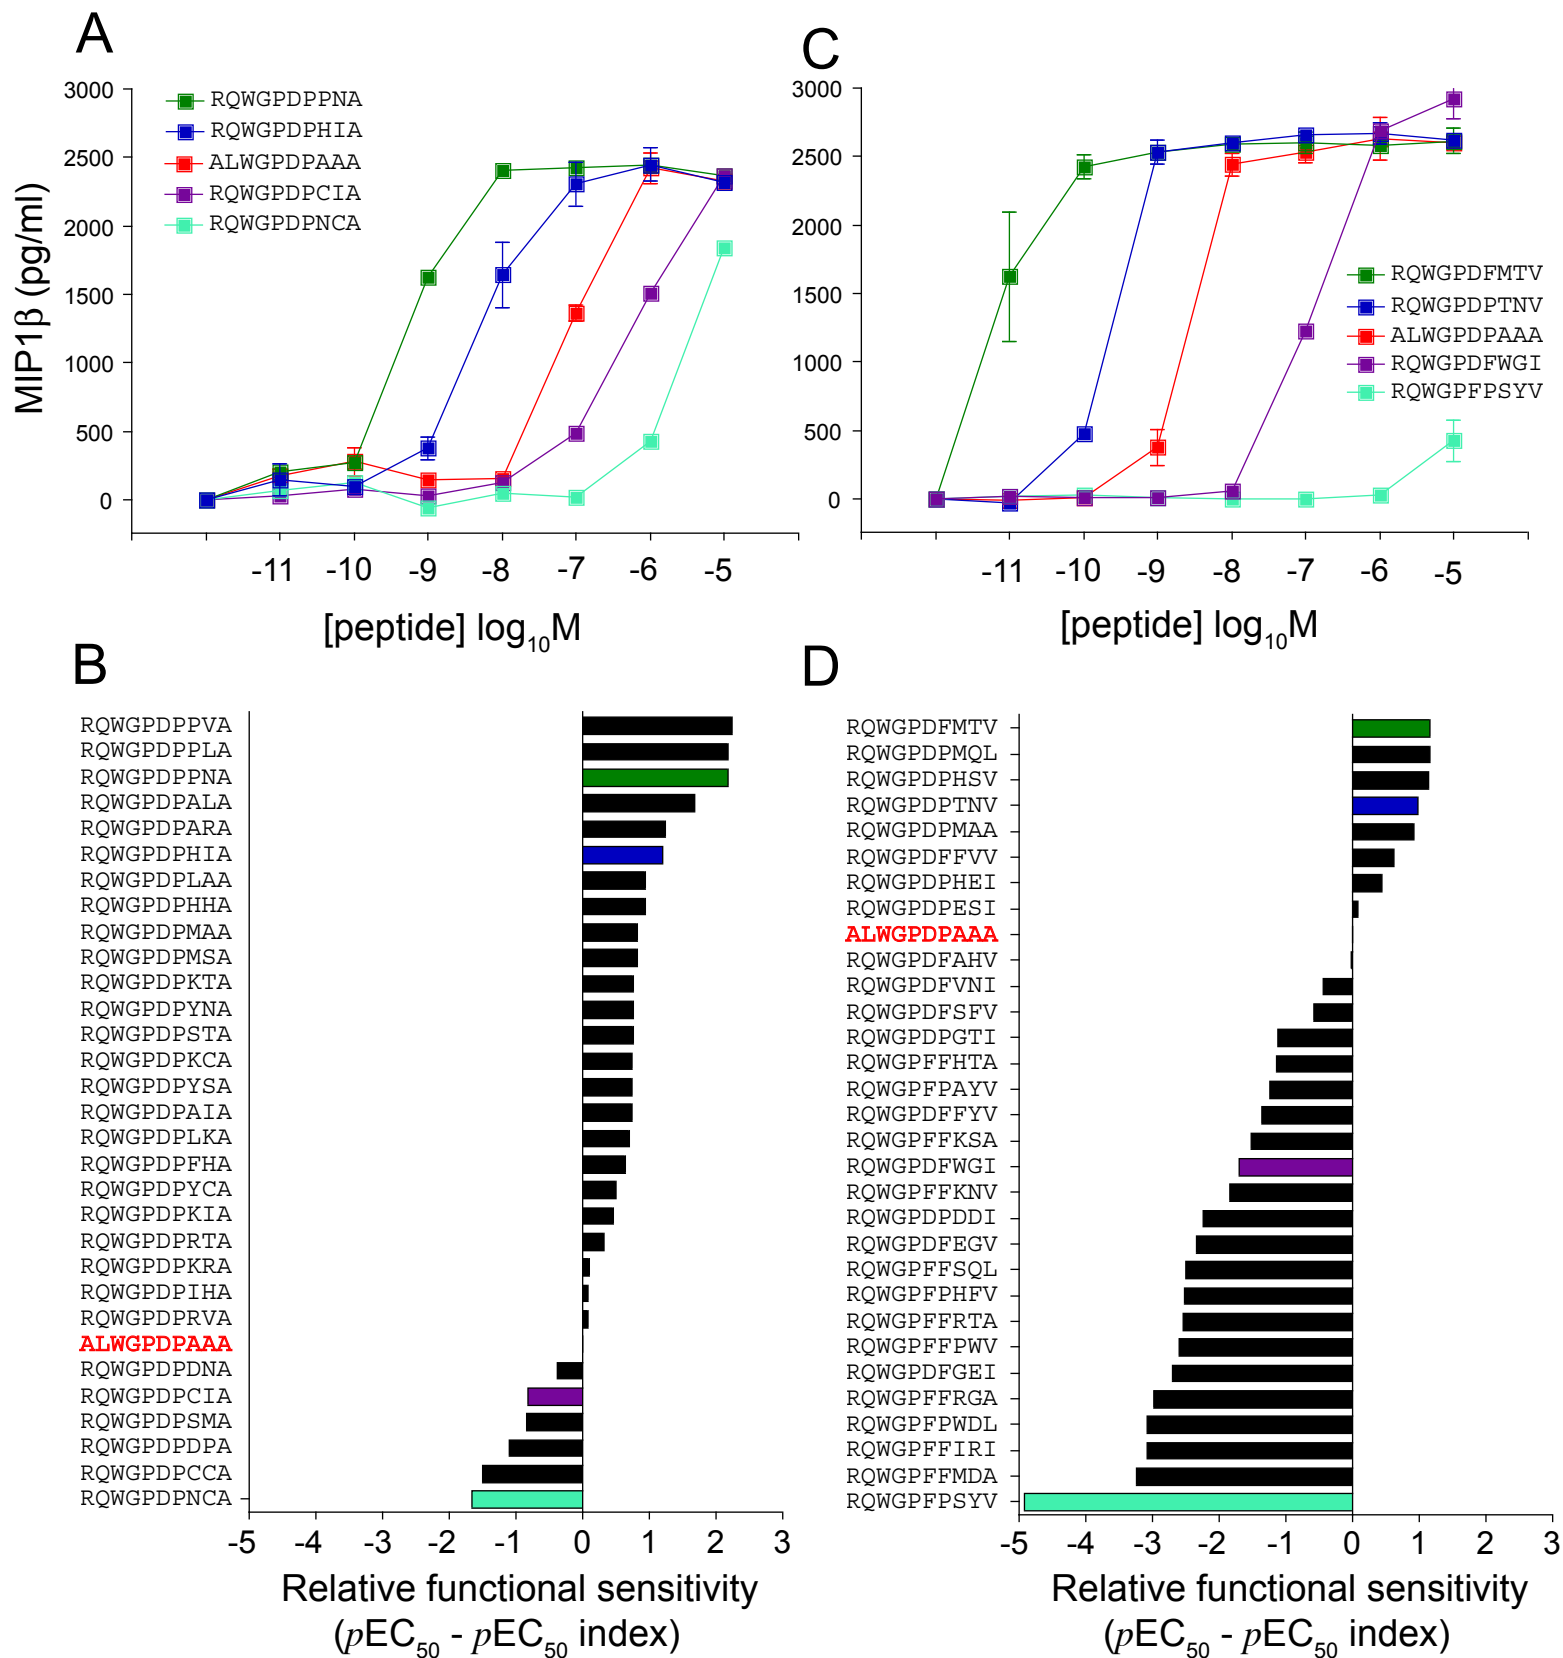

A

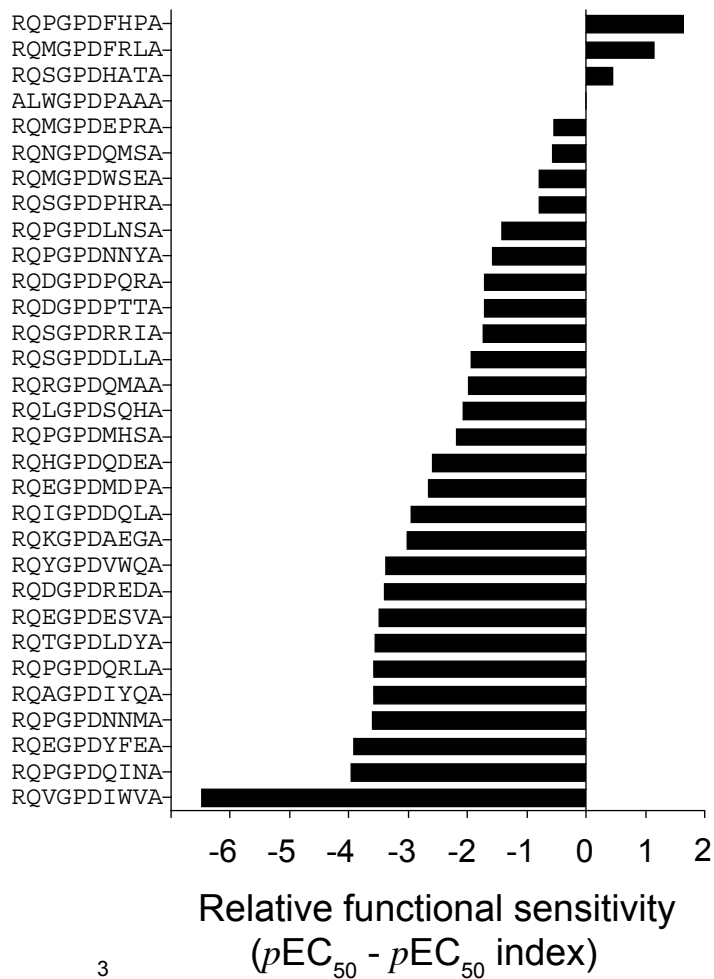

B

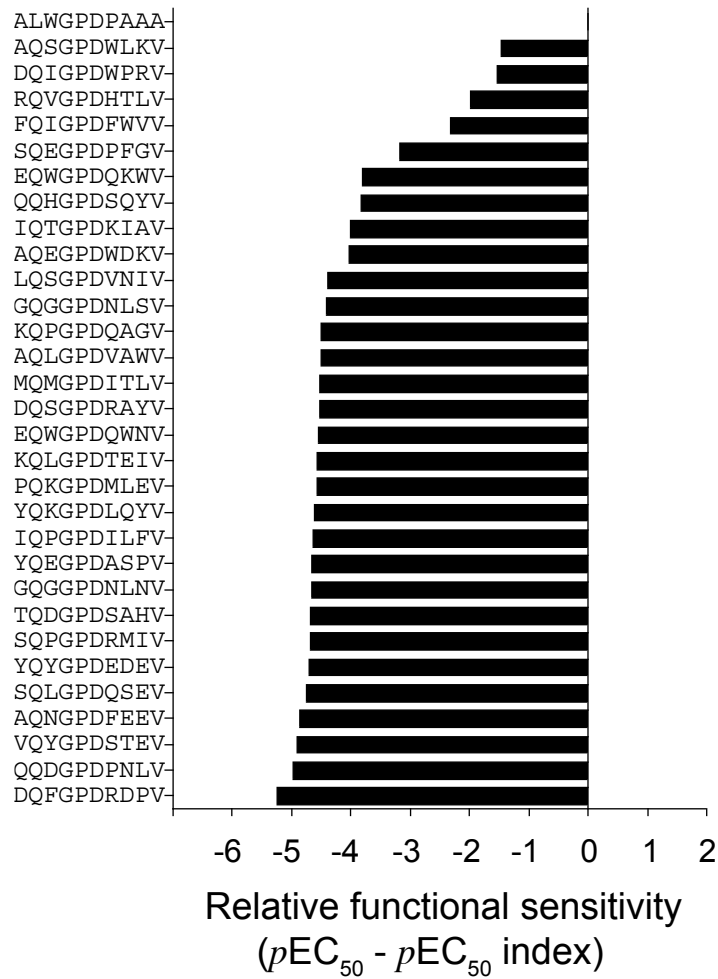

A

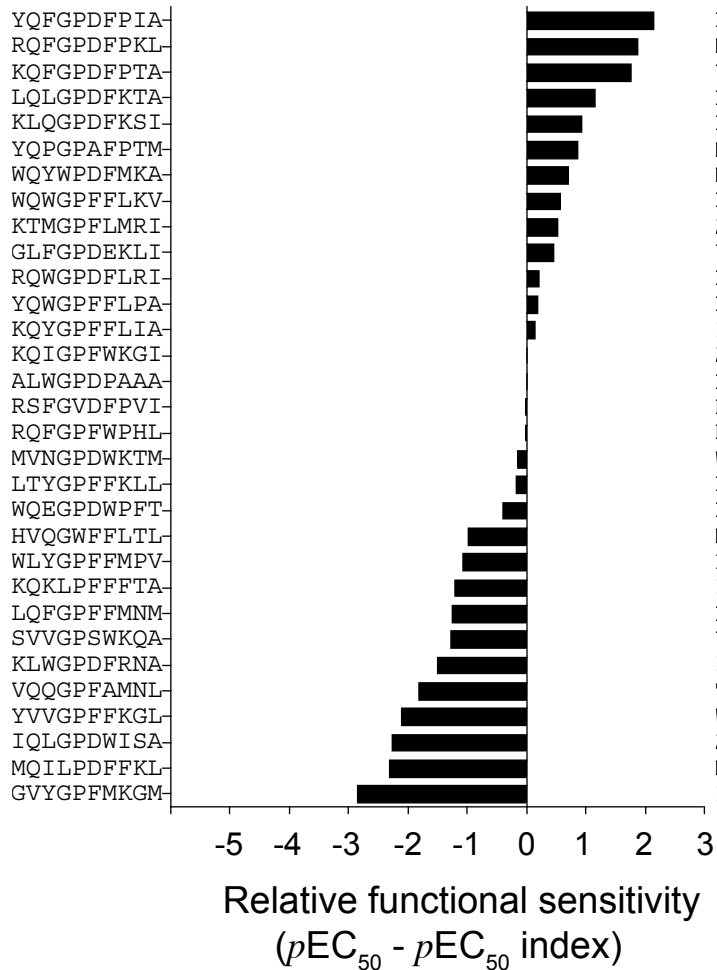

B

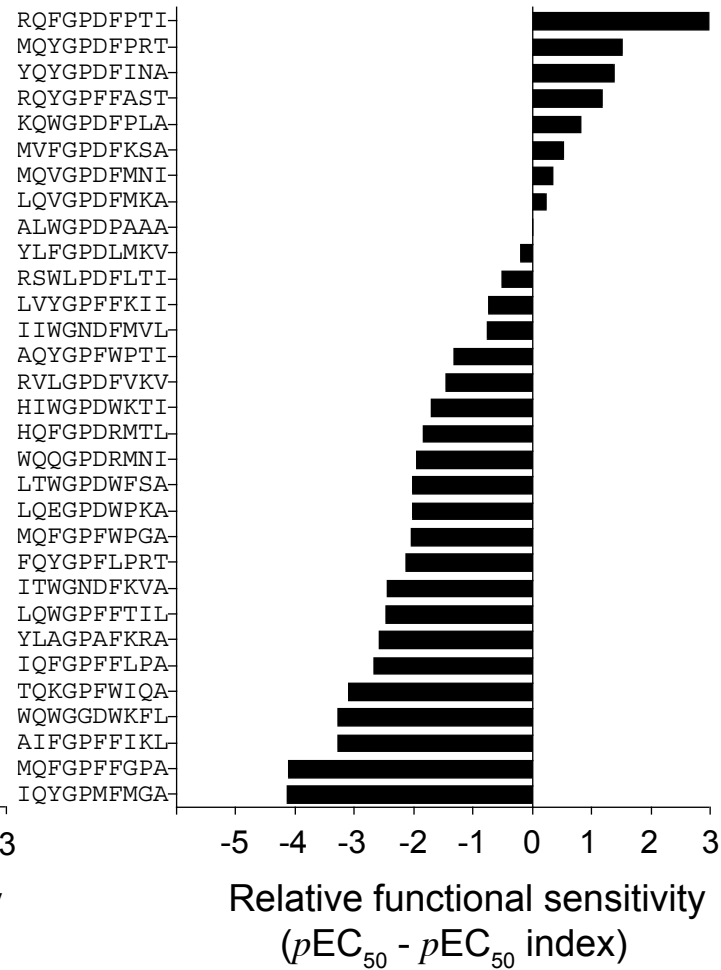

Supplementary Material: *Mathematica* Code

```

AmNum[AmAc_] :=
Module[{},
  First[First[
    Position[{"A", "C", "D", "E", "F", "G", "H", "I", "K", "L", "M", "N", "P",
      "Q", "R", "S", "T", "V", "W", "Y"}, AmAc]]]];

GenerateSample[mat_, merN_, samN_] :=
Module[{res, matnorm, biases, cnt, cntstop}, cntstop = 500 samN; cnt = 0;
  res = {1};
While[Length[Union[res]] < samN && cnt < cntstop, Print["Attempt"]; cnt++; res
= Transpose[Table[RandomChoice[mat[[p]] -> {"A", "C", "D", "E", "F", "G", "H",
"I", "K", "L", "M", "N", "P", "Q", "R", "S", "T", "V", "W", "Y"}, samN], {p,
merN}]]];
  Print["There are ", Length[Union[res]], " distinct peptides in the sample."];
  matnorm = Transpose[Table[Normalize[mat[[p]], Total], {p, merN}]];
  biases = Normalize[Exp[-Map[Total, Log[Table[matnorm[[AmNum[res][[i, p]]], p]],
{i, samN}, {p, merN}]]], Total];
Transpose[Append[Transpose[res], N[biases]]] // MatrixForm

EffectiveSampleSize[mat_, merN_] := Module[{matnorm, p, HH, Htot},
(* actually, effective population size *)
  matnorm = Table[Normalize[mat[[p]], Total], {p, merN}];
  HH = Table[0, {p, 1, merN}]; Htot = 0;
  For[p = 1, p < merN + 1, p++,
    HH[[p]] = Sum[EntroTerm[matnorm[[p, a]], {a, 1, 20}];
    Htot += HH[[p]];
  ];
  Exp[Htot]
]

EntroTerm[x_] := Module[{}, If[x > 0, x Log[1/x], 0]]

MakeWeightMatrix[motif_] :=
Module[{}], MM = Table[0, {i, 10}, {j, 20}]; motif[[1]];
  For[i = 1, i < 11, i++,
    MM[[i, First /@
StringPosition["ACDEFGHIKLMNPQRSTVWY", StringSplit[motif[[i]]]]] = 1]; MM]

Example of simultaneous fitting:

NumPep = 21; inits = Table[-6, {i, 3 + NumPep}]; inits[[1]] = 0;
inits[[2]] = 3000; inits[[3]] = 1; Print[inits]; pars = Array[a, 3 + NumPep];
PickPar[pars_, y_, ymax_] := Sum[pars[[3 + i]]*If[i == y, 1, 0], {i, ymax}];
model[pars_, SetInd_, NumPep_] := pars[[1]] + (pars[[2]] - pars[[1]])/(1 +
10^{(-pars[[3]])*(x - PickPar[pars, SetInd, NumPep])}); fitresult =
FindFit[data, model[pars, y, NumPep], Table[pars[[i]] (1 - j) + inits[[i]] j,
{i, 3 + NumPep}, {j, 0, 1}], {x, y}, MaxIterations -> 1000]

NumPerSet = 10; MyPlotRange = {{-14, -3}, {-150, 2000}}; plts =
Array[b, NumPep]; Do[
  plts[[i]] = Plot[model[pars, i, NumPep] /. fitresult, {x, -14, -1}, PlotStyle -
> Black, PlotRange -> MyPlotRange], {i, 1, NumPep}]; tmp_dat1 =
Show[plts[[Range[NumPep]]], PlotRange -> MyPlotRange, Frame -> True]; tmp_dat2
=ListPlot[data[[Range[NumPerSet NumPep], {1, 3}]], Frame -> True, PlotStyle ->
Black, PlotRange -> MyPlotRange]; Show[tmp_dat1, tmp_dat2]

```

Figure S6

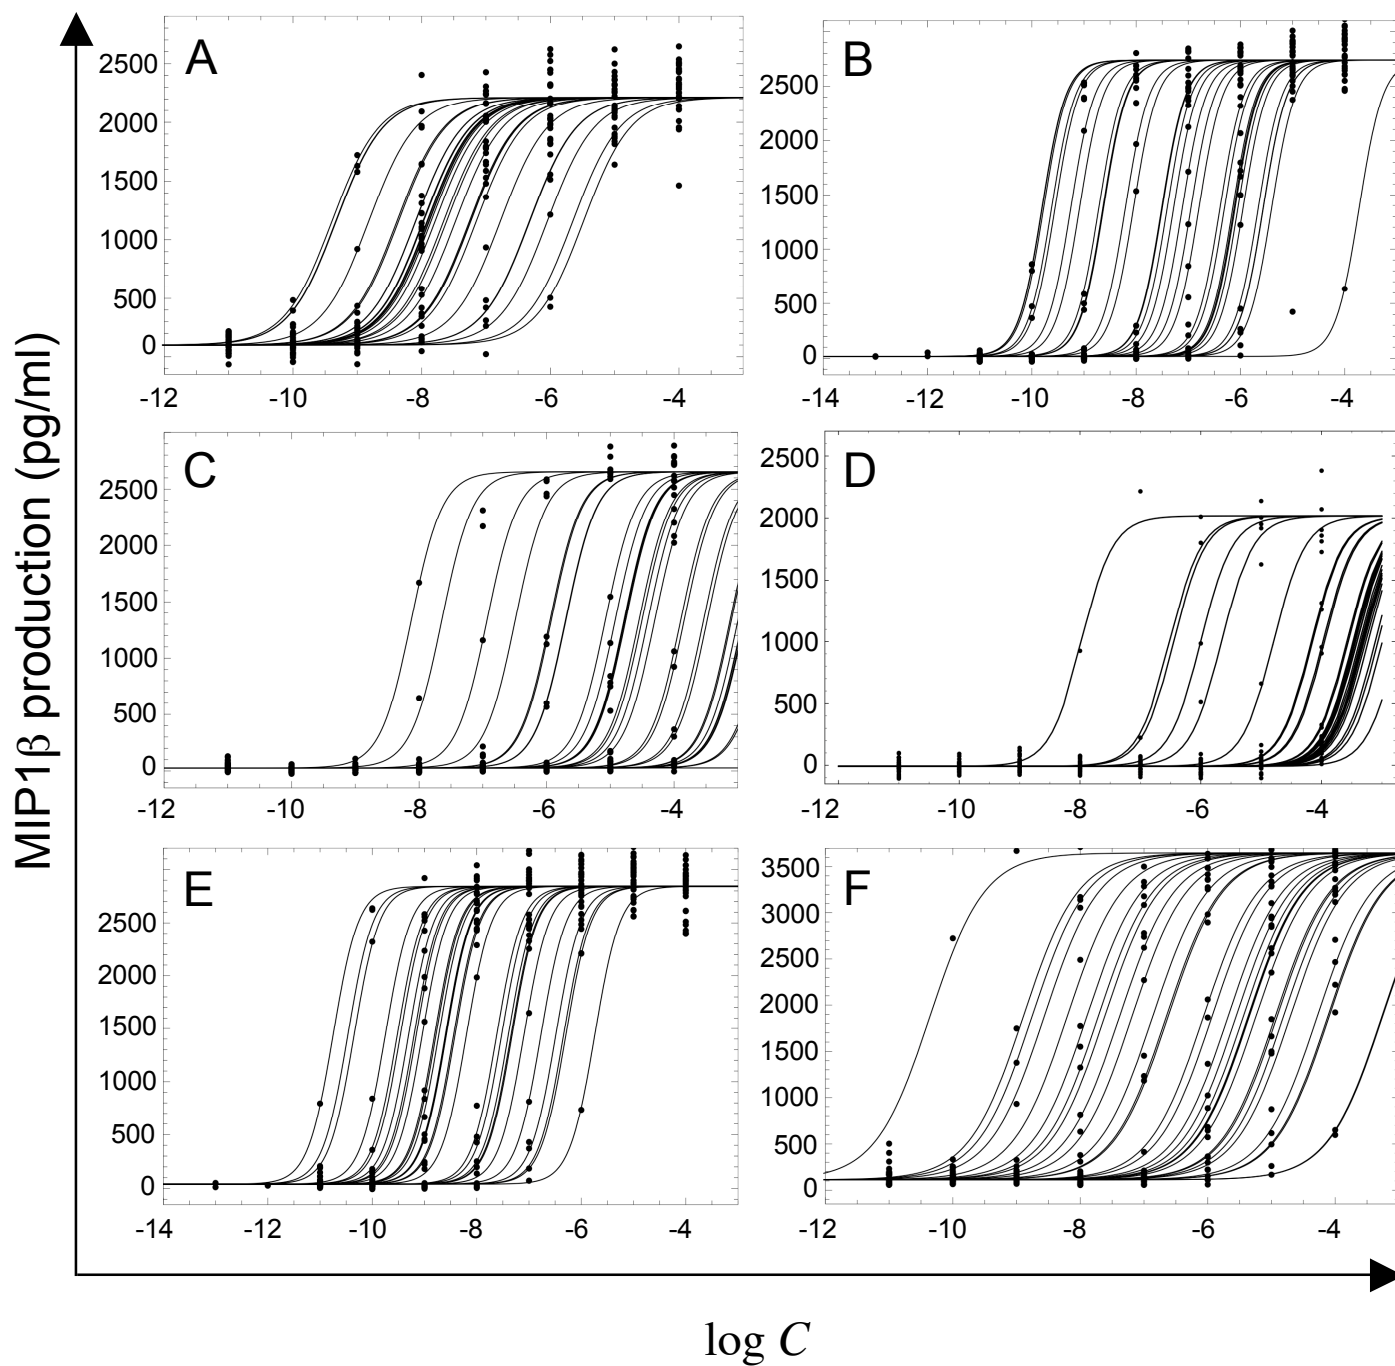

Table S1

## Amino Acid

Peptide Position

|           | <b>A</b> | <b>C</b> | <b>D</b> | <b>E</b> | <b>F</b> | <b>G</b> | <b>H</b> | <b>I</b> | <b>K</b> | <b>L</b> |
|-----------|----------|----------|----------|----------|----------|----------|----------|----------|----------|----------|
| <b>1</b>  | 302.74   | 0        | 5        | 5        | 70.66    | 365.48   | 512.89   | 361.83   | 1528.32  | 891.17   |
| <b>2</b>  | 5        | 0        | 5        | 5        | 5        | 110.86   | 5        | 246.09   | 5        | 949.64   |
| <b>3</b>  | 400      | 0        | 5        | 400      | 2856.85  | 5        | 110.25   | 441.62   | 400      | 607.31   |
| <b>4</b>  | 5        | 0        | 5        | 5        | 5        | 2234.31  | 5        | 5        | 5        | 50       |
| <b>5</b>  | 5        | 0        | 5        | 5        | 5        | 5        | 50       | 5        | 5        | 5        |
| <b>6</b>  | 398.38   | 0        | 3064.57  | 5        | 2271.47  | 5        | 5        | 5        | 5        | 5        |
| <b>7</b>  | 121.83   | 0        | 15.84    | 10       | 3044.47  | 10       | 224.16   | 10       | 10       | 254.01   |
| <b>8</b>  | 500      | 0        | 5        | 61.52    | 200      | 46.90    | 307.61   | 553.71   | 2861.12  | 1811.57  |
| <b>9</b>  | 518.38   | 0        | 5        | 5        | 200      | 913.71   | 364.87   | 1497.26  | 1252.39  | 360      |
| <b>10</b> | 2248.32  | 0        | 5        | 5        | 5        | 5        | 5        | 1944.97  | 5        | 2000     |

|           | <b>M</b> | <b>N</b> | <b>P</b> | <b>Q</b> | <b>R</b> | <b>S</b> | <b>T</b> | <b>V</b> | <b>W</b> | <b>Y</b> |
|-----------|----------|----------|----------|----------|----------|----------|----------|----------|----------|----------|
| <b>1</b>  | 821.12   | 5        | 5        | 5        | 1863.35  | 194.31   | 176.04   | 236.35   | 991.07   | 1061.12  |
| <b>2</b>  | 61.52    | 66.40    | 5        | 4851.17  | 5        | 275.94   | 546.40   | 835.74   | 5        | 5        |
| <b>3</b>  | 31.68    | 400      | 116.95   | 421.52   | 5        | 5        | 5        | 400      | 2348.22  | 2248.93  |
| <b>4</b>  | 5        | 5        | 5        | 5        | 5        | 5        | 5        | 5        | 50       | 5        |
| <b>5</b>  | 5        | 50       | 2711.88  | 5        | 5        | 5        | 5        | 50       | 50       | 5        |
| <b>6</b>  | 50       | 5        | 5        | 5        | 50       | 5        | 5        | 5        | 5        | 5        |
| <b>7</b>  | 103.55   | 10       | 10       | 10       | 140.71   | 10       | 91.37    | 10       | 1242.64  | 28.02    |
| <b>8</b>  | 2301.93  | 65.18    | 3363.05  | 5        | 200      | 5        | 5        | 200      | 18.88    | 276.55   |
| <b>9</b>  | 31.07    | 908.83   | 1254.82  | 383.15   | 557.36   | 1237.16  | 1270.66  | 1195.74  | 5        | 15.84    |
| <b>10</b> | 345.99   | 5        | 17.06    | 5        | 5        | 5        | 854.01   | 1000     | 5        | 5        |

Table S2

## Amino Acid

Peptide Position

|    | A         | C | D         | E         | F         | G         | H         | I         | K         | L         |
|----|-----------|---|-----------|-----------|-----------|-----------|-----------|-----------|-----------|-----------|
| 1  | 0.095 103 | 0 | 0.001 571 | 0.001 571 | 0.022 197 | 0.114 812 | 0.161 12  | 0.113 664 | 0.480 108 | 0.279 951 |
| 2  | 0.000 988 | 0 | 0.000 988 | 0.000 988 | 0.000 988 | 0.021 915 | 0.000 988 | 0.048 647 | 0.000 988 | 0.187 726 |
| 3  | 0.088 775 | 0 | 0.001 11  | 0.088 775 | 0.634 043 | 0.001 11  | 0.024 469 | 0.098 013 | 0.088 775 | 0.134 785 |
| 4  | 0.002 237 | 0 | 0.002 237 | 0.002 237 | 0.002 237 | 0.999 46  | 0.002 237 | 0.002 237 | 0.002 237 | 0.022 366 |
| 5  | 0.001 842 | 0 | 0.001 842 | 0.001 842 | 0.001 842 | 0.001 842 | 0.018 424 | 0.001 842 | 0.001 842 | 0.001 842 |
| 6  | 0.103 851 | 0 | 0.798 888 | 0.001 303 | 0.592 14  | 0.001 303 | 0.001 303 | 0.001 303 | 0.001 303 | 0.001 303 |
| 7  | 0.036 76  | 0 | 0.004 779 | 0.003 017 | 0.918 637 | 0.003 017 | 0.067 639 | 0.003 017 | 0.003 017 | 0.076 645 |
| 8  | 0.092 952 | 0 | 0.000 93  | 0.011 437 | 0.037 181 | 0.008 72  | 0.057 187 | 0.102 936 | 0.531 891 | 0.336 778 |
| 9  | 0.145 742 | 0 | 0.001 406 | 0.001 406 | 0.056 23  | 0.256 89  | 0.102 585 | 0.420 958 | 0.352 111 | 0.101 215 |
| 10 | 0.586 658 | 0 | 0.001 305 | 0.001 305 | 0.001 305 | 0.001 305 | 0.001 305 | 0.507 504 | 0.001 305 | 0.521 862 |

|    | M         | N         | P         | Q         | R         | S         | T         | V         | W         | Y         |
|----|-----------|-----------|-----------|-----------|-----------|-----------|-----------|-----------|-----------|-----------|
| 1  | 0.257 945 | 0.001 571 | 0.001 571 | 0.001 571 | 0.585 352 | 0.061 042 | 0.055 301 | 0.074 245 | 0.311 333 | 0.333 339 |
| 2  | 0.012 162 | 0.013 125 | 0.000 988 | 0.958 982 | 0.000 988 | 0.054 548 | 0.108 012 | 0.165 209 | 0.000 988 | 0.000 988 |
| 3  | 0.007 03  | 0.088 775 | 0.025 957 | 0.093 552 | 0.001 11  | 0.001 11  | 0.001 11  | 0.088 775 | 0.521 159 | 0.499 123 |
| 4  | 0.002 237 | 0.002 237 | 0.002 237 | 0.002 237 | 0.002 237 | 0.002 237 | 0.002 237 | 0.002 237 | 0.022 366 | 0.002 237 |
| 5  | 0.001 842 | 0.018 424 | 0.999 297 | 0.001 842 | 0.001 842 | 0.001 842 | 0.001 842 | 0.018 424 | 0.018 424 | 0.001 842 |
| 6  | 0.013 034 | 0.001 303 | 0.001 303 | 0.001 303 | 0.013 034 | 0.001 303 | 0.001 303 | 0.001 303 | 0.001 303 | 0.001 303 |
| 7  | 0.031 246 | 0.003 017 | 0.003 017 | 0.003 017 | 0.042 458 | 0.003 017 | 0.027 57  | 0.003 017 | 0.374 954 | 0.008 455 |
| 8  | 0.427 936 | 0.012 117 | 0.625 202 | 0.000 93  | 0.037 181 | 0.000 93  | 0.000 93  | 0.037 181 | 0.003 51  | 0.051 411 |
| 9  | 0.008 734 | 0.255 52  | 0.352 796 | 0.107 723 | 0.156 703 | 0.347 829 | 0.357 249 | 0.336 184 | 0.001 406 | 0.004 453 |
| 10 | 0.090 279 | 0.001 305 | 0.004 45  | 0.001 305 | 0.001 305 | 0.001 305 | 0.222 838 | 0.260 931 | 0.001 305 | 0.001 305 |

Table S3

I: RQWGPDP{A/C/D/F/H/I/K/L/M/N/P/R/S/V/Y}  
{A/C/G/H/I/K/L/M/N/P/Q/R/S/T/V}A motif

| Number       | Peptide Sequence | pEC <sub>50</sub> |
|--------------|------------------|-------------------|
| 1            | RQWGPDPNCA       | 5.484             |
| 2            | RQWGPDPCCA       | 5.651             |
| 3            | RQWGPDPDEA       | 6.047             |
| 4            | RQWGPDPDMA       | 6.319             |
| 5            | RQWGPDPDCA       | 6.326             |
| 6            | RQWGPDPDPA       | 6.777             |
| <b>Index</b> | ALWGPDPAAA       | 7.151             |
| 7            | RQWGPDPDRA       | 7.236             |
| 8            | RQWGPDPDHA       | 7.24              |
| 9            | RQWGPDPDKA       | 7.257             |
| 10           | RQWGPDPDPA       | 7.473             |
| 11           | RQWGPDPDKA       | 7.612             |
| 12           | RQWGPDPDCA       | 7.659             |
| 13           | RQWGPDPDFA       | 7.791             |
| 14           | RQWGPDPDLA       | 7.854             |
| 15           | RQWGPDPDPA       | 7.882             |
| 16           | RQWGPDPDPA       | 7.884             |
| 17           | RQWGPDPDKA       | 7.887             |
| 18           | RQWGPDPDPA       | 7.907             |
| 19           | RQWGPDPDPA       | 7.912             |
| 20           | RQWGPDPDKA       | 7.916             |
| 21           | RQWGPDPDPA       | 7.969             |
| 22           | RQWGPDPDPA       | 7.979             |
| 23           | RQWGPDPDPA       | 8.093             |
| 24           | RQWGPDPDPA       | 8.096             |
| 25           | RQWGPDPDPA       | 8.36              |
| 26           | RQWGPDPDPA       | 8.384             |
| 27           | RQWGPDPDPA       | 8.823             |
| 28           | RQWGPDPDPA       | 9.328             |
| 29           | RQWGPDPDPA       | 9.335             |
| 30           | RQWGPDPDPA       | 9.395             |

II: RQWGP{D/F}{P/F}xx{A/I/L/V} motif

| Number       | Peptide Sequence | pEC <sub>50</sub> |
|--------------|------------------|-------------------|
| 1            | RQWGPFFPSYV      | 3.723             |
| 2            | RQWGPFFMDA       | 5.401             |
| 3            | RQWGPFFIRI       | 5.561             |
| 4            | RQWGPFFPDL       | 5.564             |
| 5            | RQWGPFFRGA       | 5.658             |
| 6            | RQWGPDFGEI       | 5.949             |
| 7            | RQWGPFFFPWV      | 6.048             |
| 8            | RQWGPFFRFA       | 6.102             |
| 9            | RQWGPFFPHFV      | 6.121             |
| 10           | RQWGPFFFSQL      | 6.147             |
| 11           | RQWGPDFEGV       | 6.306             |
| 12           | RQWGPDPDDI       | 6.391             |
| 13           | RQWGPFFKRV       | 6.795             |
| 14           | RQWGPDFWGI       | 6.949             |
| 15           | RQWGPFFKSA       | 7.114             |
| 16           | RQWGPDFFFV       | 7.28              |
| 17           | RQWGPFFPAYV      | 7.404             |
| 18           | RQWGPFFHTA       | 7.498             |
| 19           | RQWGPDPGTI       | 7.51              |
| 20           | RQWGPDFSFV       | 8.05              |
| 21           | RQWGPDFVNI       | 8.206             |
| 22           | RQWGPDFAHV       | 8.625             |
| <b>Index</b> | ALWGPDPAAA       | 8.639             |
| 23           | RQWGPDPESI       | 8.716             |
| 24           | RQWGPDPHEI       | 9.086             |
| 25           | RQWGPDFFFV       | 9.253             |
| 26           | RQWGPDPDPA       | 9.556             |
| 27           | RQWGPDPDPA       | 9.622             |
| 28           | RQWGPDPDPA       | 9.774             |
| 29           | RQWGPDPDPA       | 9.802             |
| 30           | RQWGPDFMTV       | 9.808             |

III: RQxGPDxxxA motif

| Number       | Peptide Sequence | pEC <sub>50</sub> |
|--------------|------------------|-------------------|
| 1            | RQVGPDIWVA       | Null              |
| 2            | RQPGPDQINA       | 2.538             |
| 3            | RQEGPDYFEA       | 2.567             |
| 4            | RQPGPDNMA        | 2.891             |
| 5            | RQAGPDYQA        | 2.901             |
| 6            | RQPGPDQRLA       | 2.92              |
| 7            | RQTGPDLDYA       | 2.926             |
| 8            | RQEGPDESVA       | 2.996             |
| 9            | RQDGPREDPA       | 3.099             |
| 10           | RQYGPDVWQA       | 3.12              |
| 11           | RQKGPDAEGA       | 3.479             |
| 12           | RQIGPDDQLA       | 3.536             |
| 13           | RQEGPDMDDPA      | 3.84              |
| 14           | RQHGPDQDEA       | 3.894             |
| 15           | RQPGPDMHSA       | 4.302             |
| 16           | RQLGPDSQHA       | 4.409             |
| 17           | RQSGPDQMAA       | 4.502             |
| 18           | RQSGPDDLLA       | 4.548             |
| 19           | RQSGPDRRIA       | 4.756             |
| 20           | RQDGPDPDPA       | 4.771             |
| 21           | RQDGPDPDPA       | 4.784             |
| 22           | RQPGPDNRYA       | 4.922             |
| 23           | RQPGPDLNSA       | 5.076             |
| 24           | RQSGPDPHRA       | 5.694             |
| 25           | RQMGPDWSEA       | 5.701             |
| 26           | RQNGPDQMSA       | 5.924             |
| 27           | RQMGPDPEPA       | 5.944             |
| <b>Index</b> | ALWGPDPAAA       | 6.49              |
| 28           | RQSGPDHATA       | 6.932             |
| 29           | RQMGPDFRLA       | 7.642             |
| 30           | RQPGPDFHPA       | 8.12              |



Table S3 cont

IV: xQxGPDxxxV motif

| Number       | Peptide Sequence | pEC <sub>50</sub> |
|--------------|------------------|-------------------|
| 1            | DQFGPDRDPV       | 2.731             |
| 2            | QQDGPDPNLV       | 2.991             |
| 3            | VQYGPDSTEV       | 3.064             |
| 4            | AQNGPDFEEV       | 3.109             |
| 5            | SQLGPDQSEV       | 3.226             |
| 6            | YQYGPDEDEV       | 3.261             |
| 7            | SQPGPDRMIV       | 3.29              |
| 8            | TQDGPDSAHV       | 3.294             |
| 9            | GQGGPDNLNV       | 3.308             |
| 10           | YQEGPDASPV       | 3.32              |
| 11           | IQPGPDILFV       | 3.342             |
| 12           | YQKGPDLQYV       | 3.37              |
| 13           | PQKGPDMLEV       | 3.413             |
| 14           | KQLGPDTEIV       | 3.417             |
| 15           | EQWGPDQWNV       | 3.437             |
| 16           | DQSGPDRAYV       | 3.45              |
| 17           | MQMGPDITLV       | 3.457             |
| 18           | AQLGPDVAWV       | 3.464             |
| 19           | KQPGPDQAGV       | 3.477             |
| 20           | GQGGPDNLSV       | 3.556             |
| 21           | LQSGPDVNIV       | 3.577             |
| 22           | AQEGPDWDKV       | 3.949             |
| 23           | IQTGPDKIAV       | 3.975             |
| 24           | QQHGPDSQYV       | 4.147             |
| 25           | EQWGPDQKWV       | 4.166             |
| 26           | SQEGPDFFGV       | 4.792             |
| 27           | FQIGPDFWVV       | 5.654             |
| 28           | RQVGPDHTLV       | 5.999             |
| 29           | DQIGPDWPRV       | 6.446             |
| 30           | AQSGPDWLKV       | 6.512             |
| <b>Index</b> | ALWGPDPAAA       | 7.976             |

Va: Biased sampling set (1st)

| Number       | Peptide Sequence | pEC <sub>50</sub> |
|--------------|------------------|-------------------|
| 1            | GVYGPFMKGM       | 5.741             |
| 2            | MQILPDDFFKL      | 6.293             |
| 3            | IQLGPDWISA       | 6.337             |
| 4            | YVVGPFVKGL       | 6.487             |
| 5            | VQQGPFAMNL       | 6.771             |
| 6            | KLWGPDFRNA       | 7.095             |
| 7            | SVVGPSWKQA       | 7.323             |
| 8            | LQFGPFFMNM       | 7.343             |
| 9            | KQKLPFFFTA       | 7.395             |
| 10           | WLYGPFMPV        | 7.523             |
| 11           | HVQGWFFLTL       | 7.617             |
| 12           | WQEGPDWPFT       | 8.197             |
| 13           | LTYGPFKLL        | 8.416             |
| 14           | MVNGPDWKTM       | 8.442             |
| 15           | RQFGPFWPHL       | 8.582             |
| 16           | RSFGVDFPVI       | 8.586             |
| <b>Index</b> | ALWGPDPAAA       | 8.593             |
| 17           | KQIGPFWKGI       | 8.601             |
| 18           | KQYGPFFLIA       | 8.726             |
| 19           | YQWGPFFLPA       | 8.78              |
| 20           | RQWGPDFLRI       | 8.807             |
| 21           | GLFGPDEKLI       | 9.043             |
| 22           | KTMGPFLMRI       | 9.12              |
| 23           | WQWGPFFLKV       | 9.158             |
| 24           | WQYWPDFMKA       | 9.305             |
| 25           | YQPGPAFPTM       | 9.461             |
| 26           | KLQGPDFKSI       | 9.521             |
| 27           | LQLGPDFKTA       | 9.749             |
| 28           | KQFGPDFPTA       | 10.346            |
| 29           | RQFGPDFPKL       | 10.467            |
| 30           | YQFGPDFPIA       | 10.749            |

Vb: Biased sampling set (2nd)

| Number       | Peptide Sequence | pEC <sub>50</sub> |
|--------------|------------------|-------------------|
| 1            | IQYGPFMFGA       | 3.254             |
| 2            | MQFGPFFGPA       | 3.265             |
| 3            | AIFGPFPIKL       | 4.093             |
| 4            | WQWGGDWKFL       | 4.114             |
| 5            | TQKGPFWIQA       | 4.279             |
| 6            | IQFGPFFLPA       | 4.703             |
| 7            | YLAGPAFKRA       | 4.81              |
| 8            | LQWGPFFTIL       | 4.91              |
| 9            | ITWGNDFKVA       | 4.939             |
| 10           | FQYGPFLPRT       | 5.242             |
| 11           | MQFGPFWPGA       | 5.346             |
| 12           | LQEGPDWPKA       | 5.353             |
| 13           | LTWGPDFWFA       | 5.365             |
| 14           | WQQGPDRMNI       | 5.44              |
| 15           | HQFGPDRMTL       | 5.553             |
| 16           | HIWGPDWKTI       | 5.679             |
| 17           | RVLGPDFVKV       | 5.931             |
| 18           | AQYGPFWPTI       | 6.063             |
| 19           | IIWGNDFMVL       | 6.618             |
| 20           | LVYGPFFKII       | 6.646             |
| 21           | RSWLPDFLTI       | 6.86              |
| 22           | YLFGPDLMKV       | 7.186             |
| <b>Index</b> | ALWGPDPAAA       | 7.381             |
| 23           | LQVGPDFMKA       | 7.615             |
| 24           | MQVGPDFMNI       | 7.716             |
| 25           | MVFGPDFKSA       | 7.895             |
| 26           | KQWGPDFPLA       | 8.203             |
| 27           | RQYGPFFAST       | 8.564             |
| 28           | YQYGPDFINA       | 8.754             |
| 29           | MQYGPDFPRT       | 8.892             |
| 30           | RQFGPDFPTI       | 10.357            |
